# Supplementary material for: Contrasting transit times of water from peatlands and eucalypt forests in the Australian Alps determined by tritium: implications for vulnerability and the source of water in upland catchments
Source: Copernicus journal article supplement (doi:10.5194/hess-20-4757-2016), 2016-12-01
Supplement: Supplementary file 1 [file hess-20-4757-2016-supplement.pdf]

Supplement of Hydrol. Earth Syst. Sci., 20, 4757–4773, 2016  
<http://www.hydrol-earth-syst-sci.net/20/4757/2016/>  
doi:10.5194/hess-20-4757-2016-supplement  
© Author(s) 2016. CC Attribution 3.0 License.

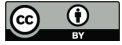

Hydrology and  
Earth System  
Sciences

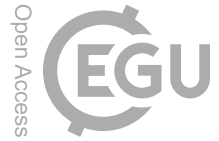

*Supplement of*

## **Contrasting transit times of water from peatlands and eucalypt forests in the Australian Alps determined by tritium: implications for vulnerability and the source of water in upland catchments**

**Ian Cartwright and Uwe Morgenstern**

*Correspondence to:* Ian Cartwright ([ian.cartwright@monash.edu](mailto:ian.cartwright@monash.edu))

The copyright of individual parts of the supplement might differ from the CC-BY 3.0 licence.

a: Mount Buffalo

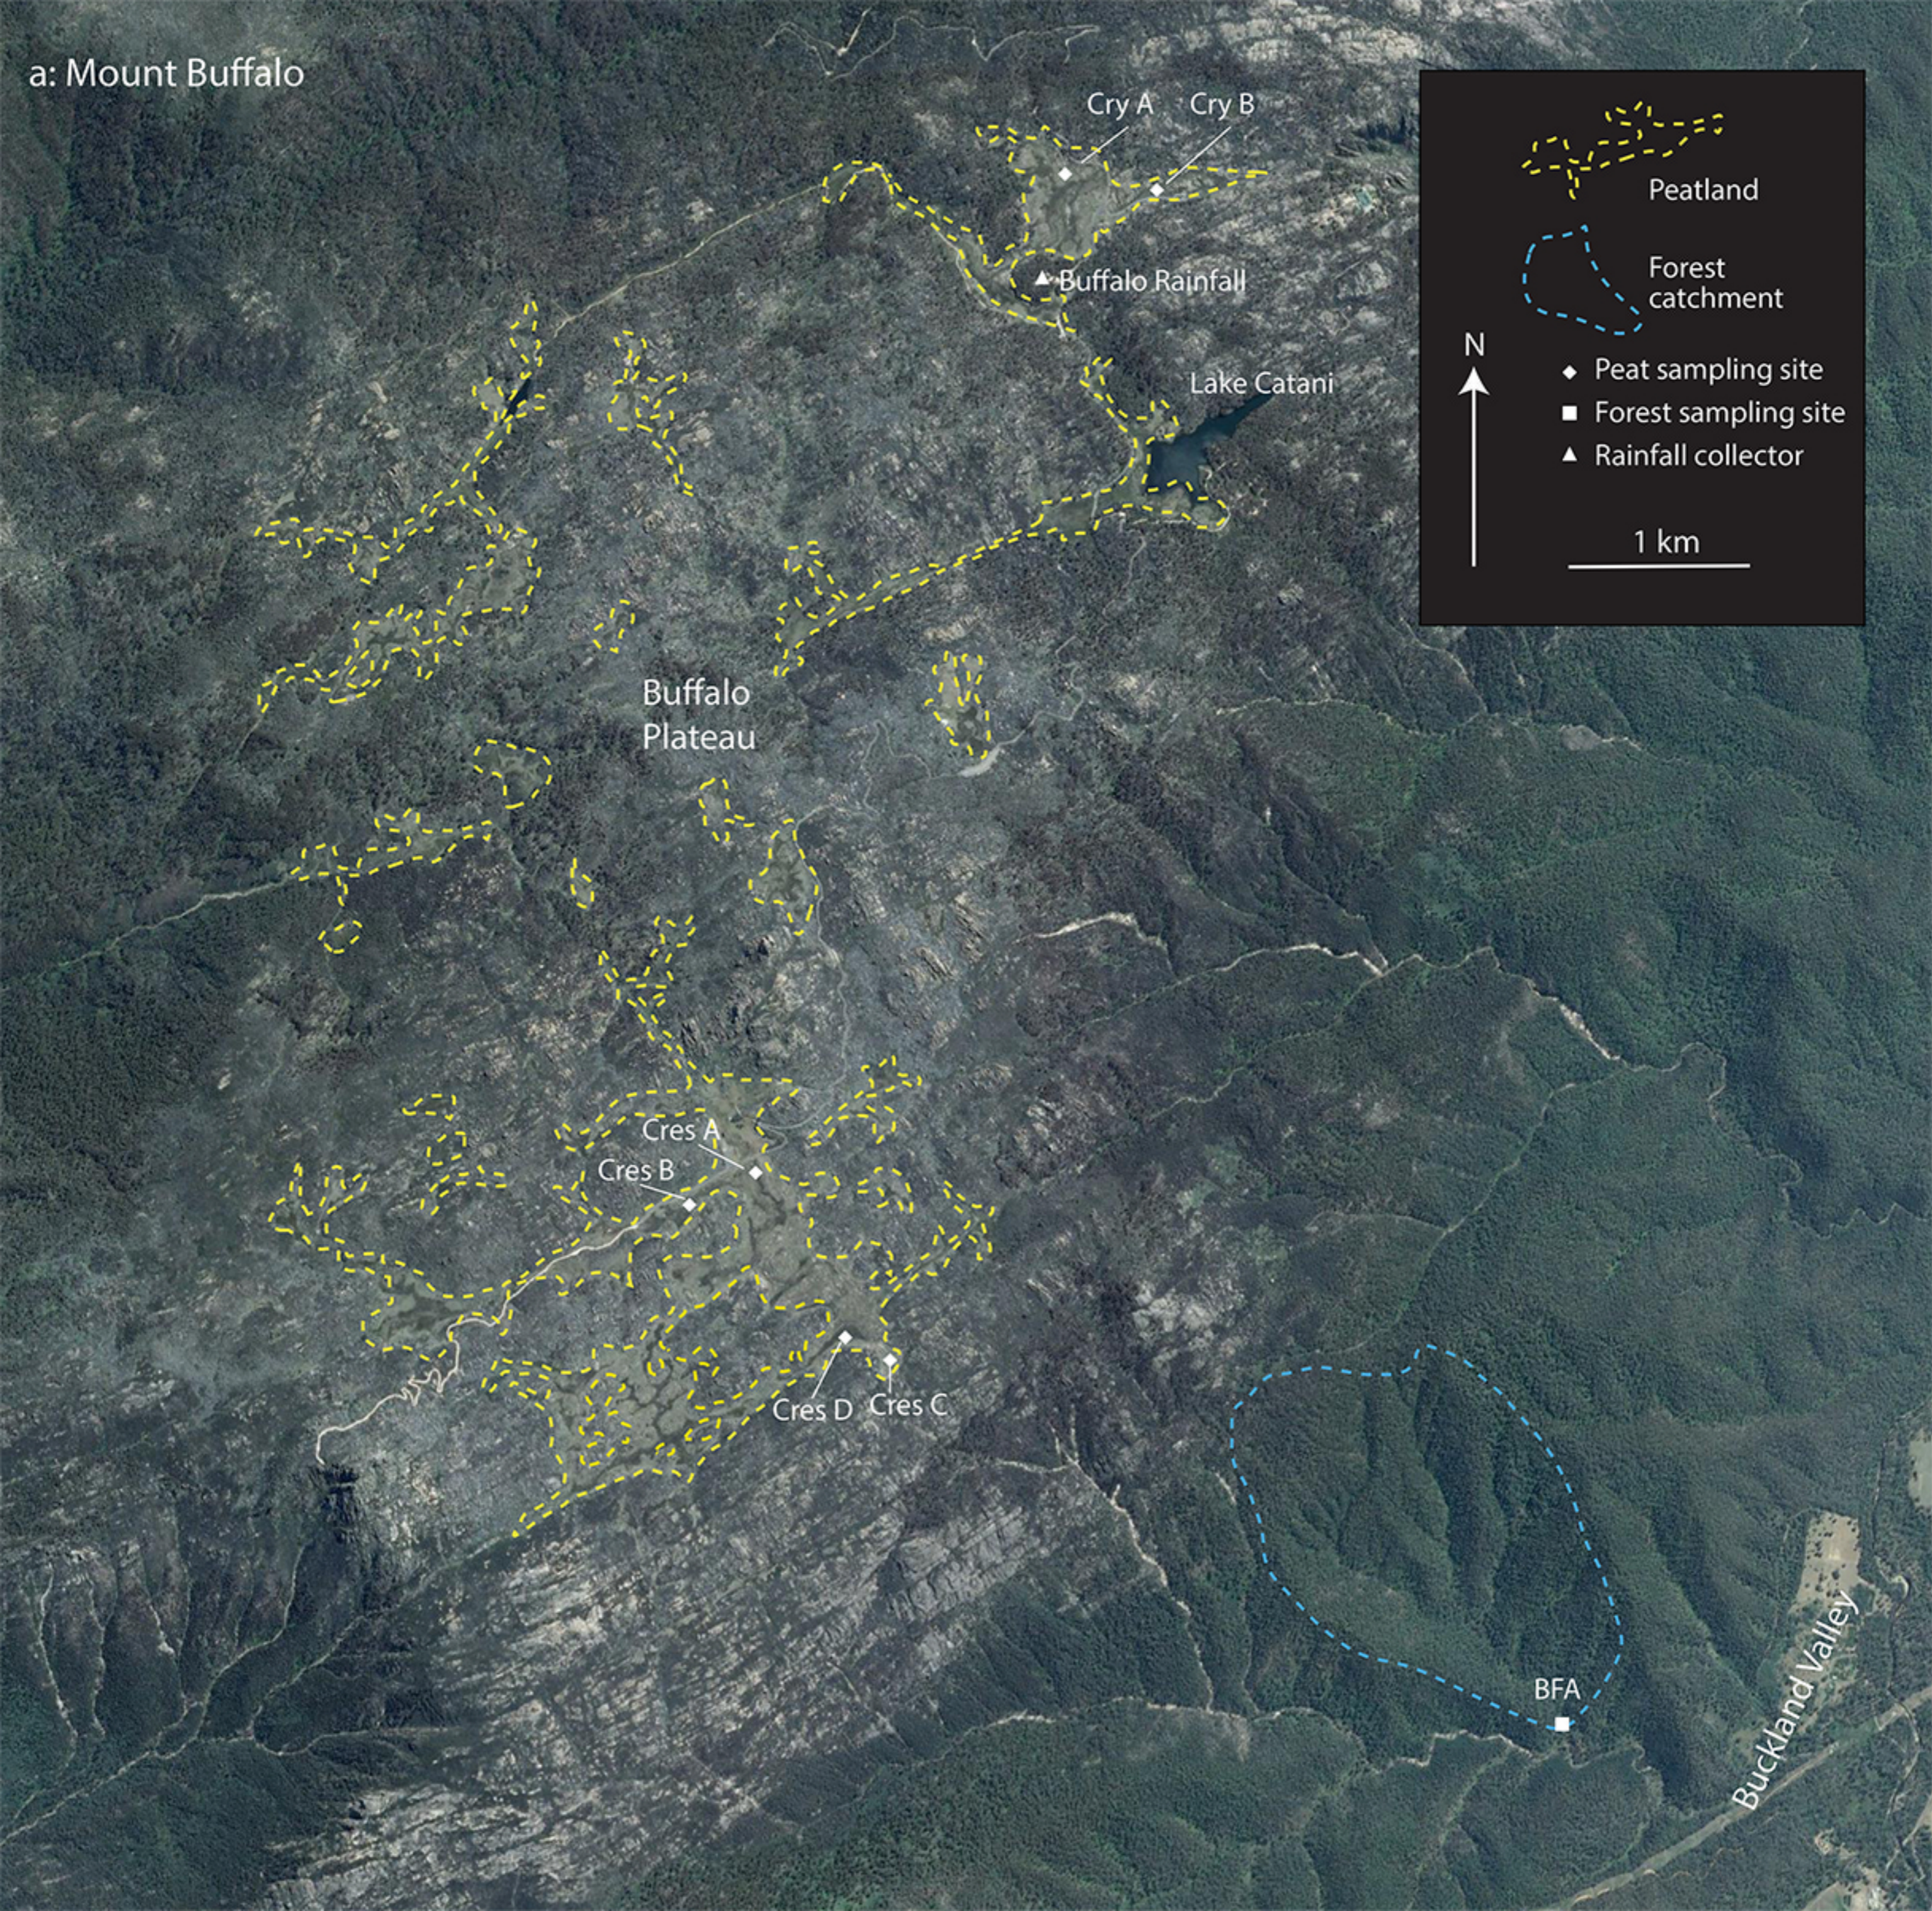

**Legend**

- Peatland
- Forest catchment
- ◆ Peat sampling site
- Forest sampling site
- ▲ Rainfall collector

N

1 km

b: Falls Creek

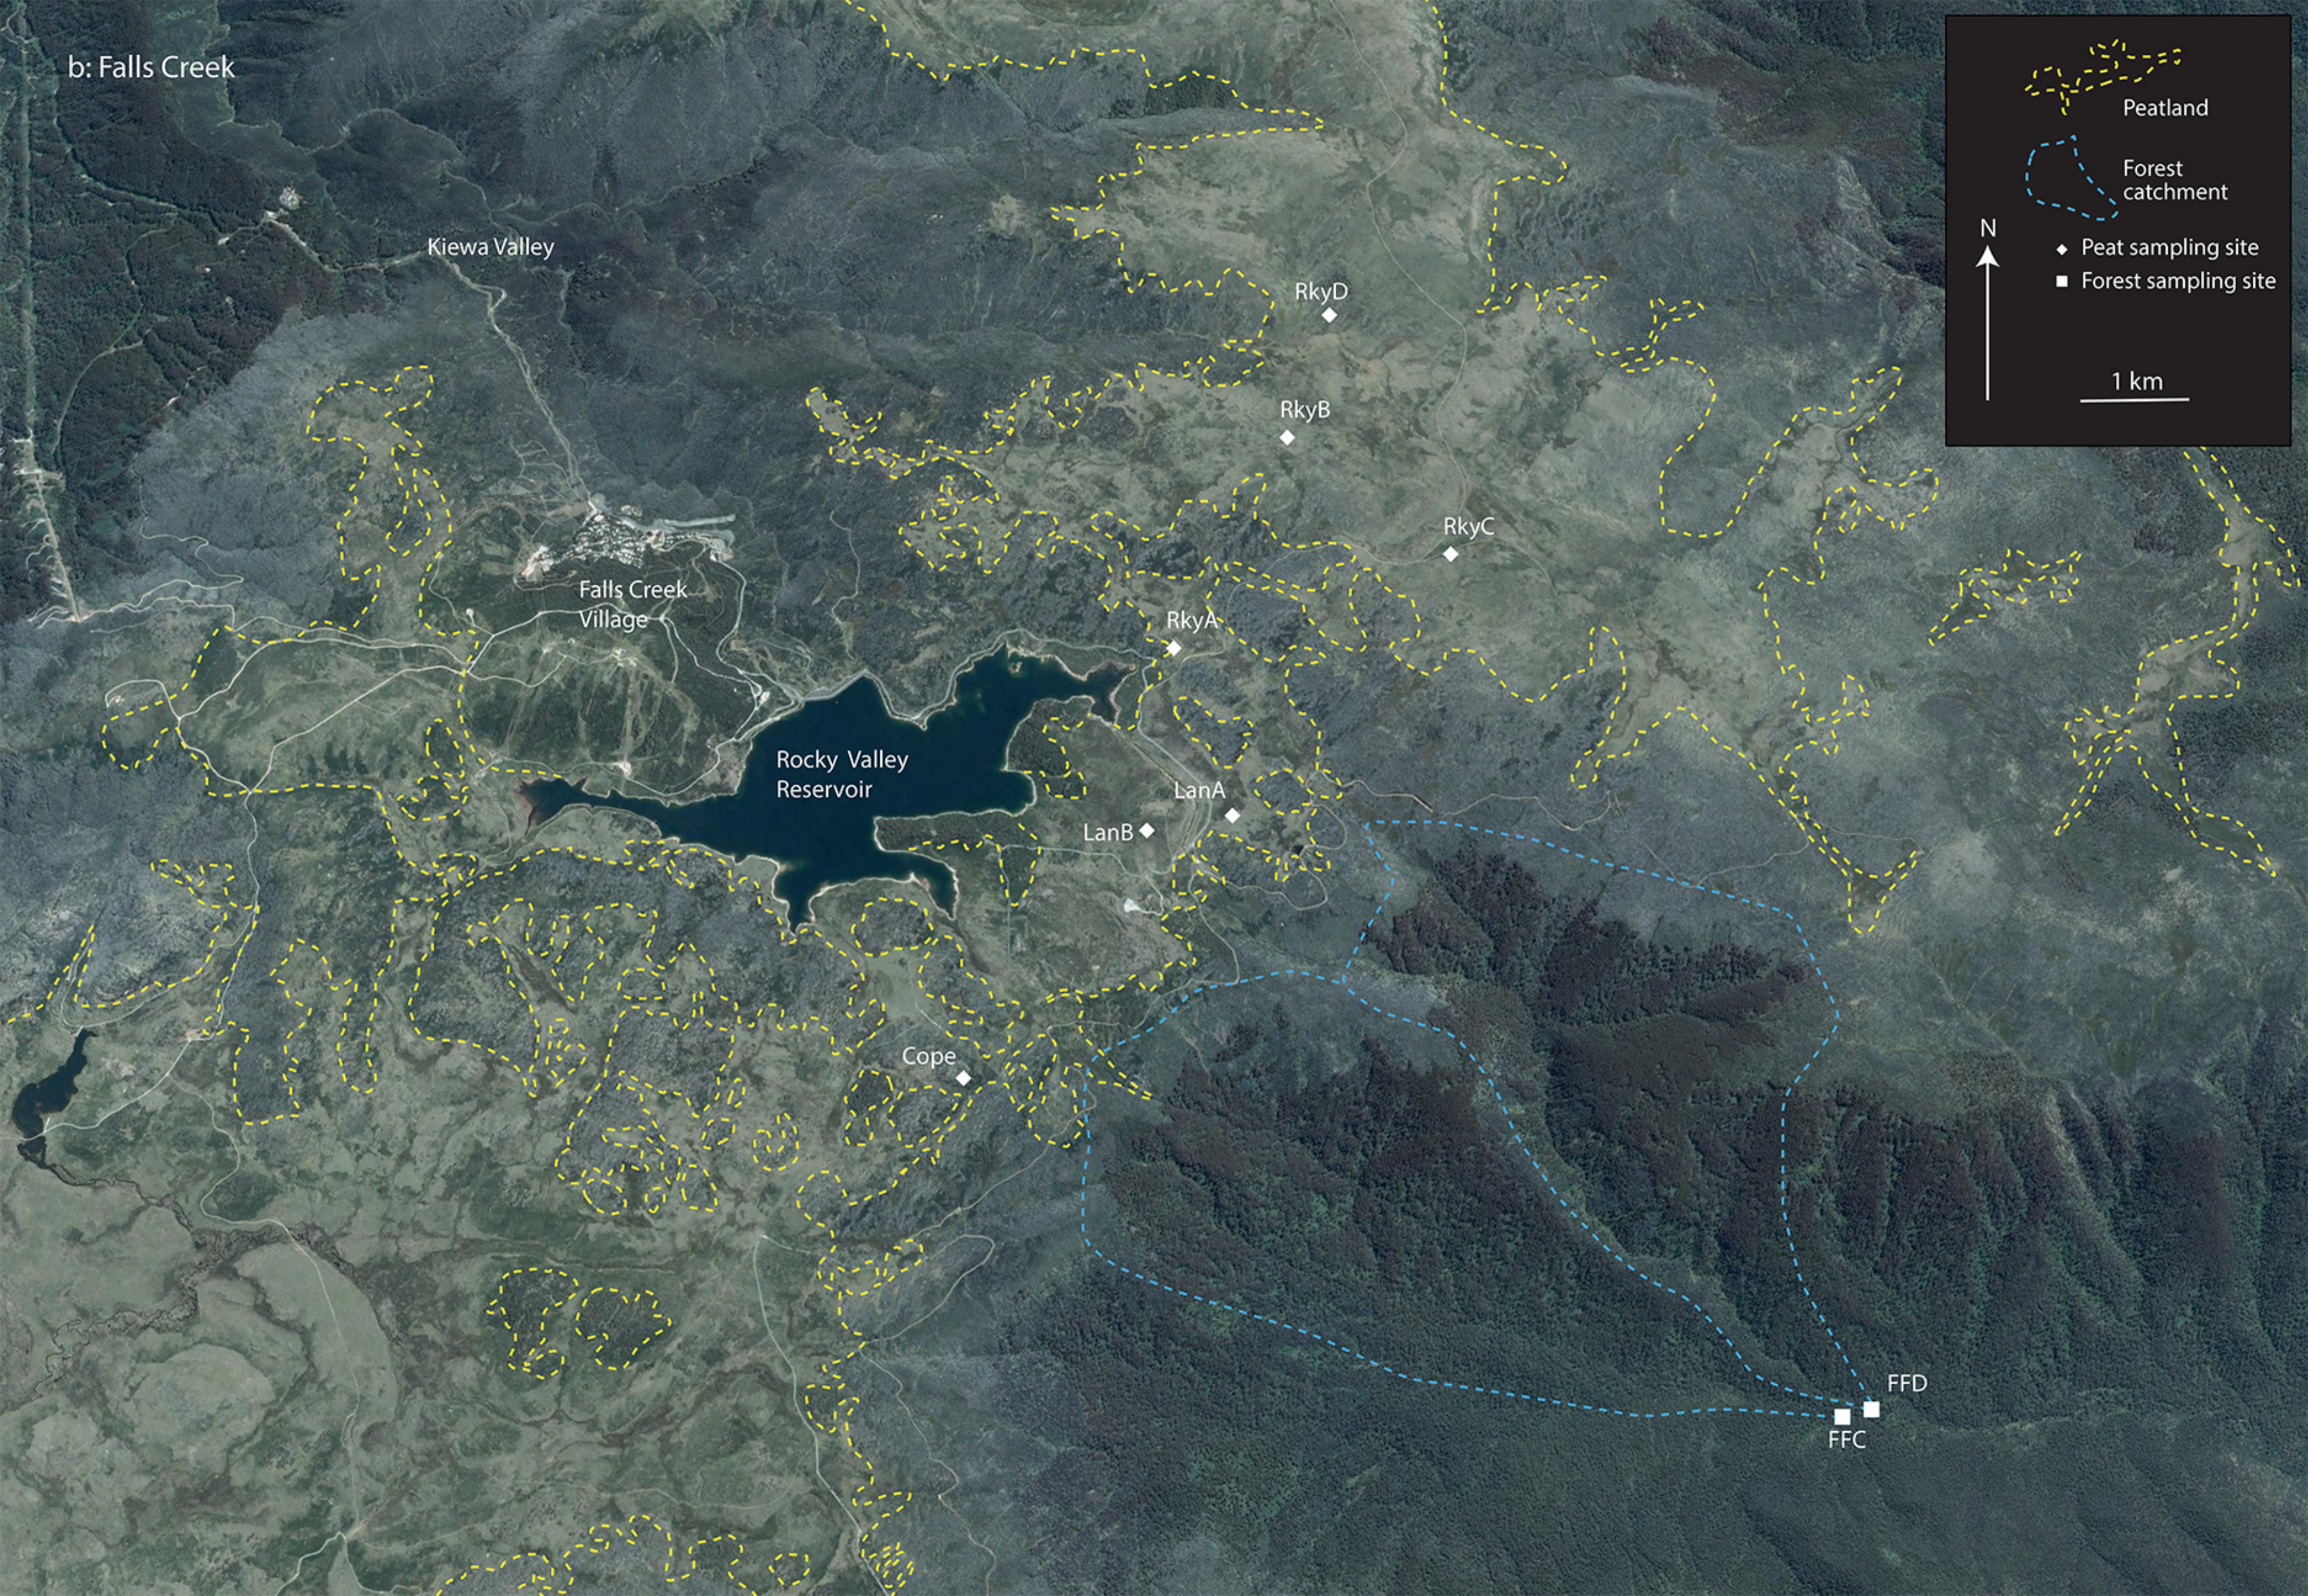

Kiewa Valley

Falls Creek Village

Rocky Valley Reservoir

Cope

LanB

LanA

RkyA

RkyB

RkyD

RkyC

FFC

FFD

N

1 km

Peatland

Forest catchment

◆ Peat sampling site

■ Forest sampling site

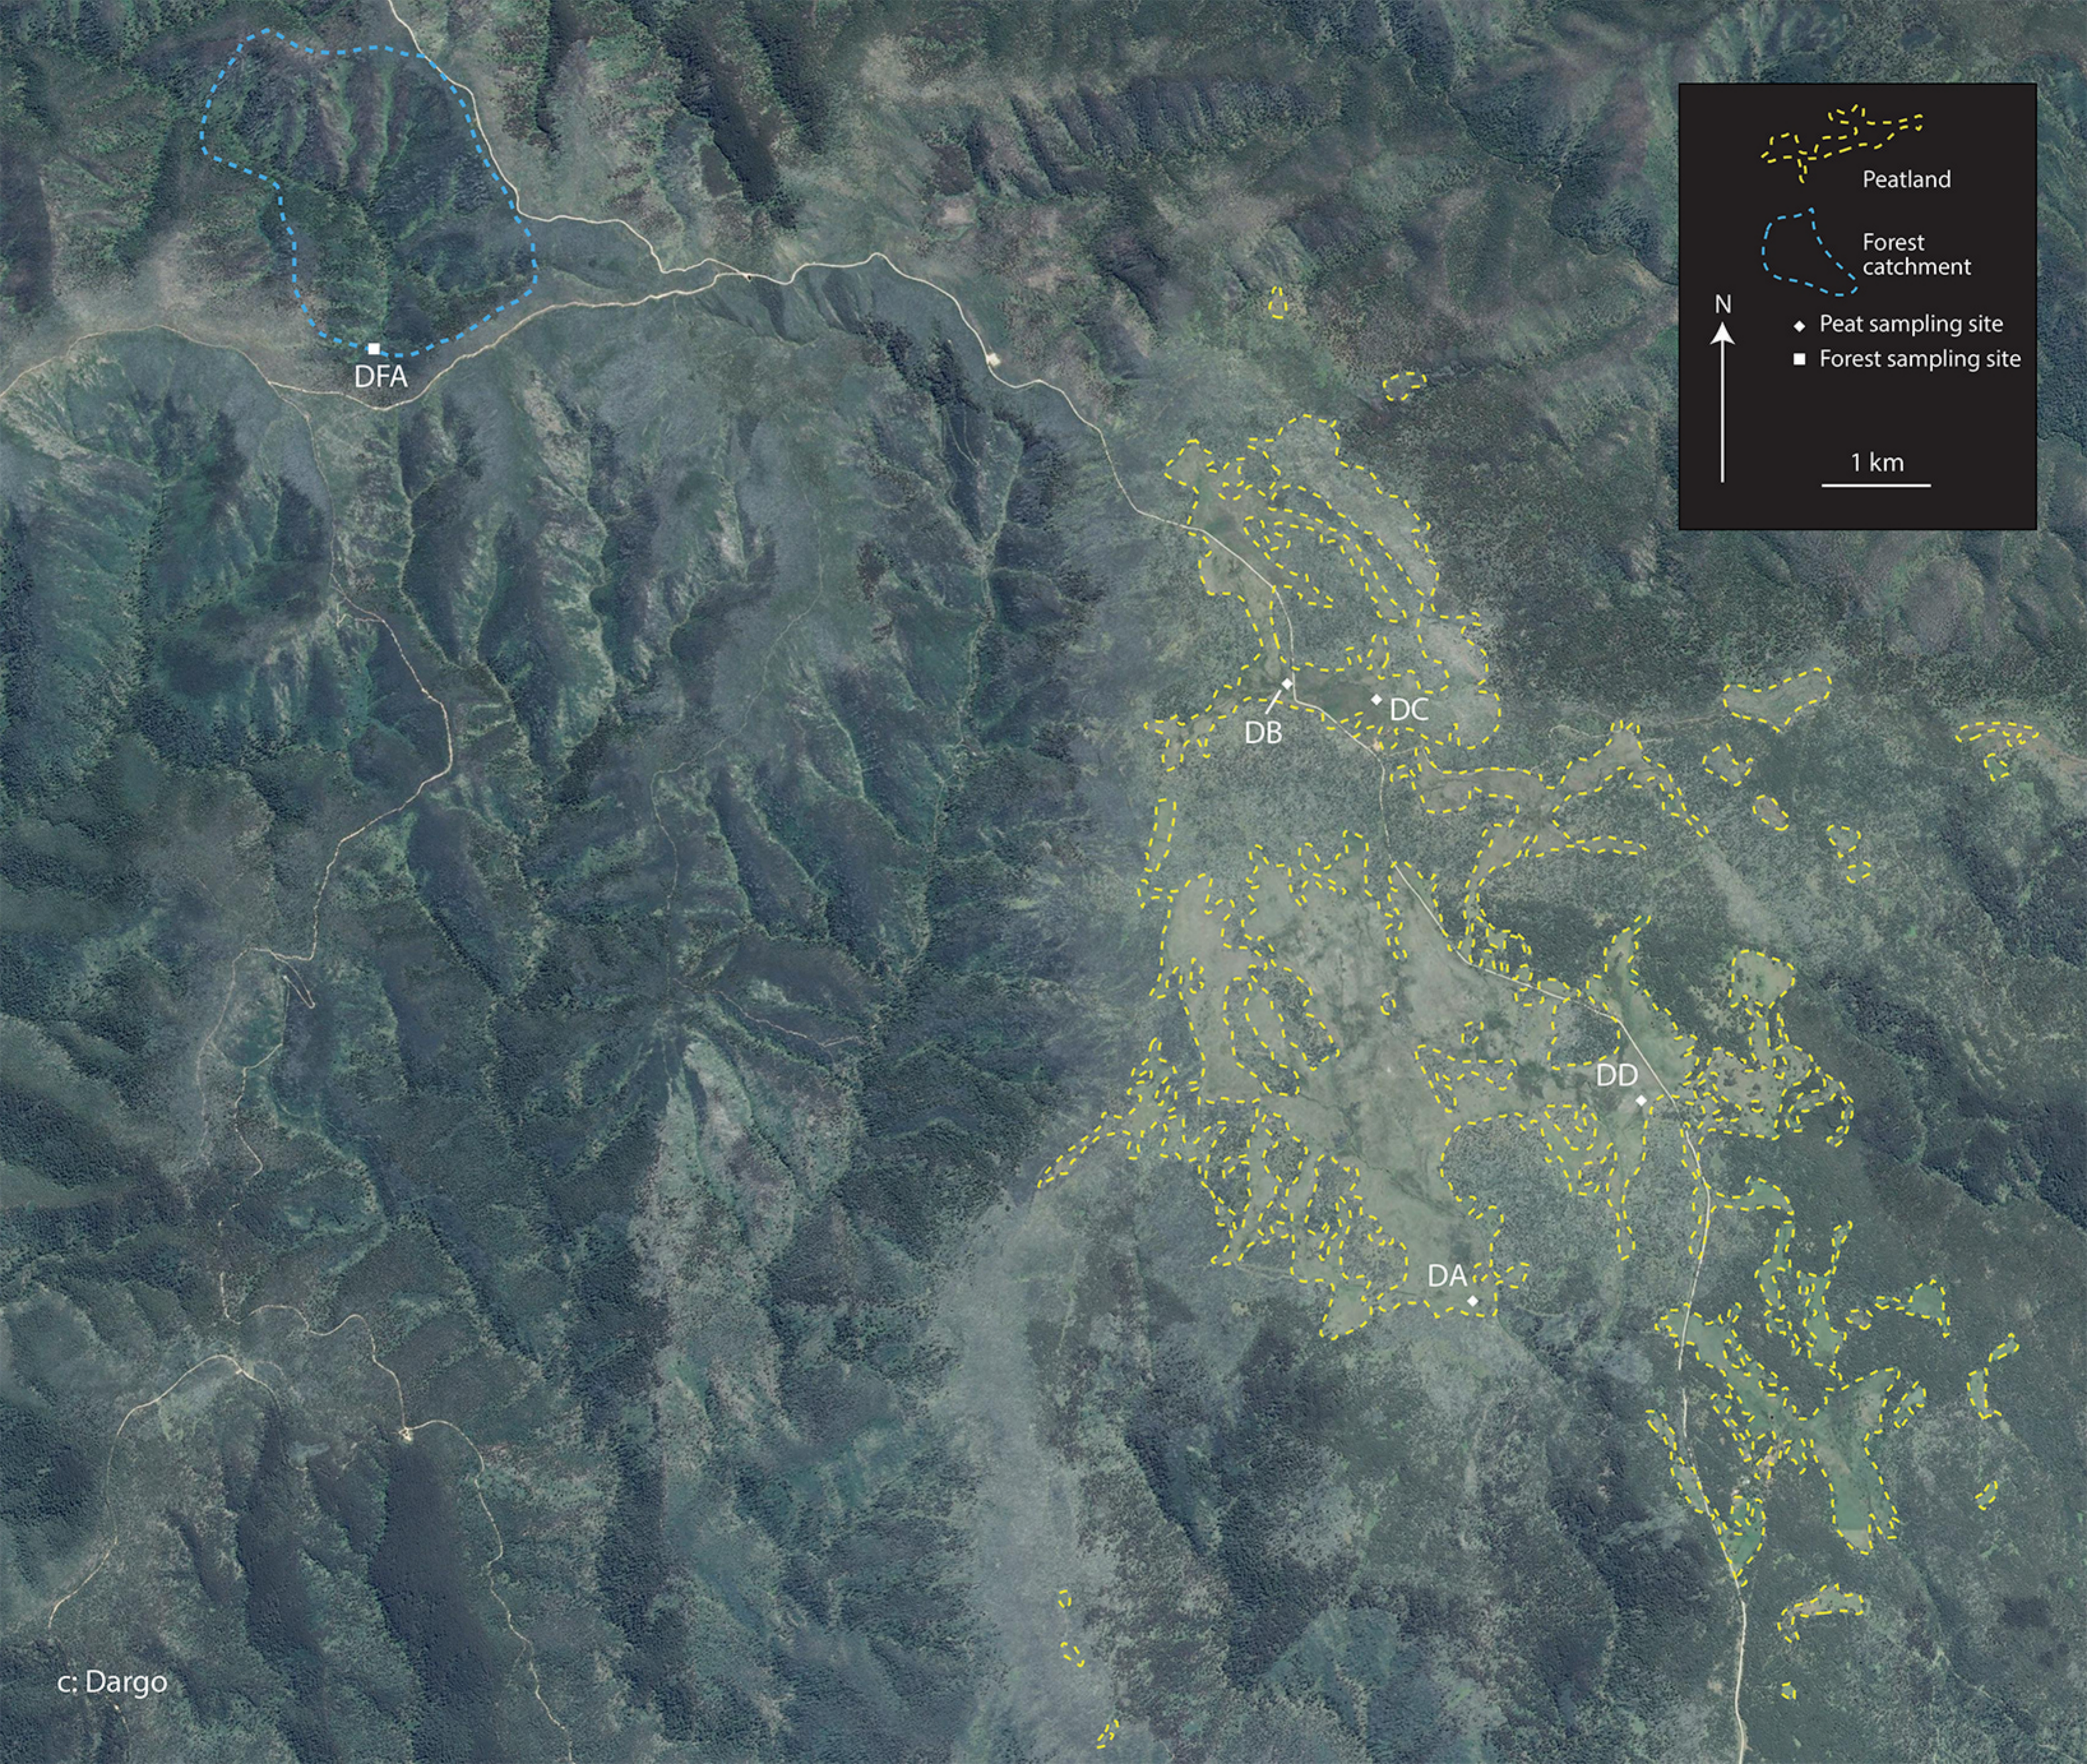

Peatland

Forest catchment

N

◆ Peat sampling site

■ Forest sampling site

1 km
